# Supplementary figures and images for: Construction of a 2D@0D InVO4@MnWO4 S-scheme for efficient photocatalytic reduction of CO2 to CO
Source: Royal Society of Chemistry journal article supplement (doi:10.1039/d4nj05419a), 2025-01-01

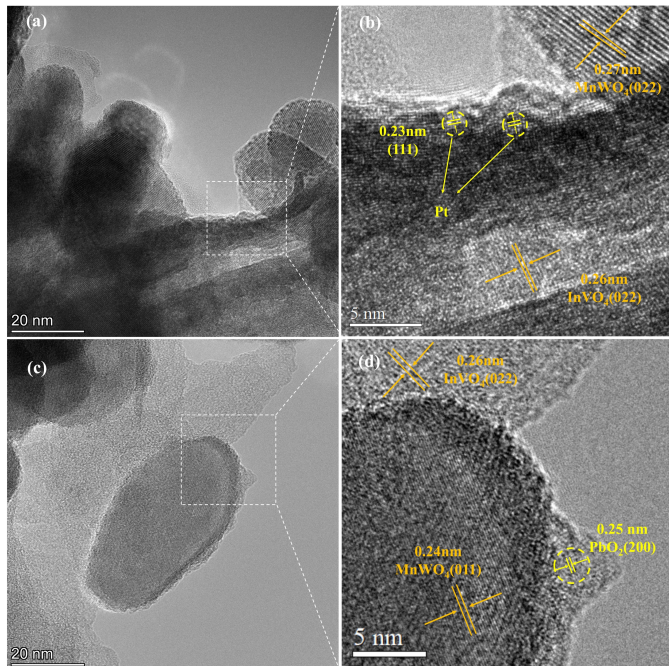

Supplement: d4nj05419a10.pdf [file d4nj05419a10.pdf]

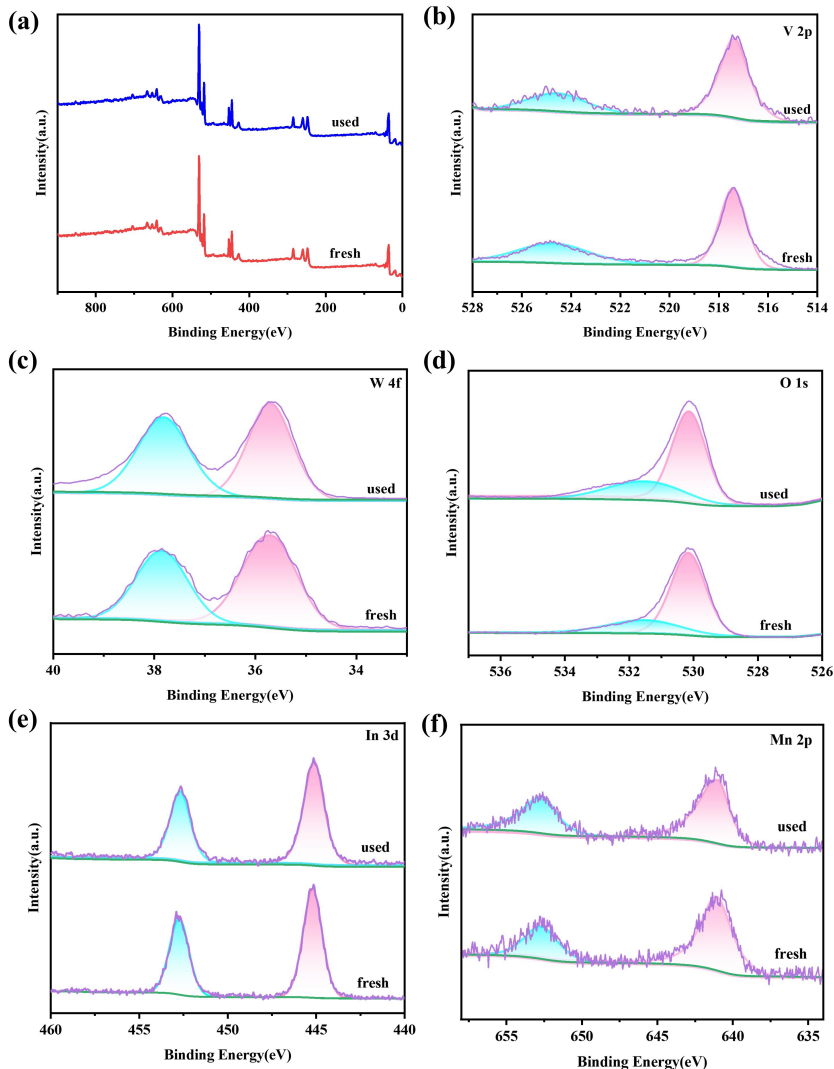

Supplement: d4nj05419a12.pdf [file d4nj05419a12.pdf]

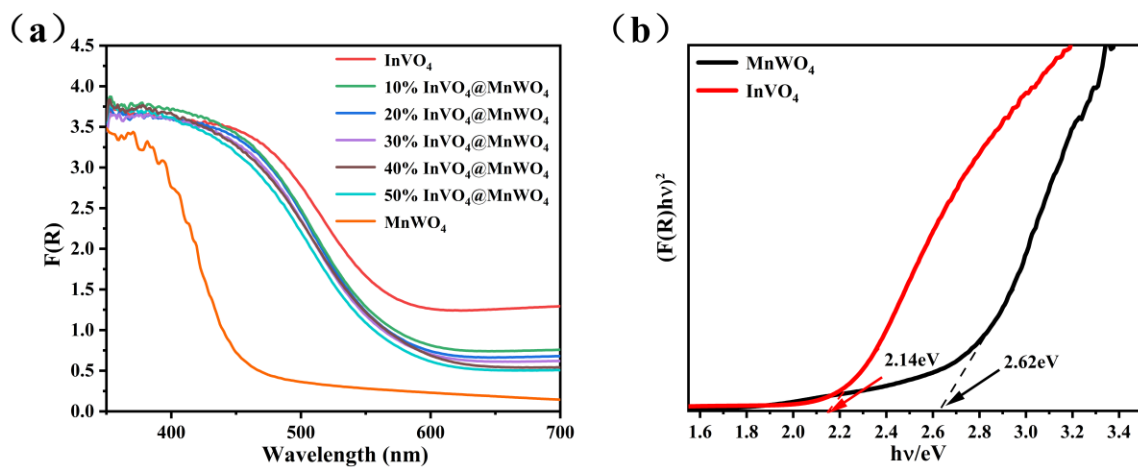

Fig. S5 (a) UV-vis DRS spectra of samples, (b) Tauc plots of  $\text{MnWO}_4$  and  $\text{InVO}_4$ .

Supplement: d4nj05419a2.pdf [file d4nj05419a2.pdf]

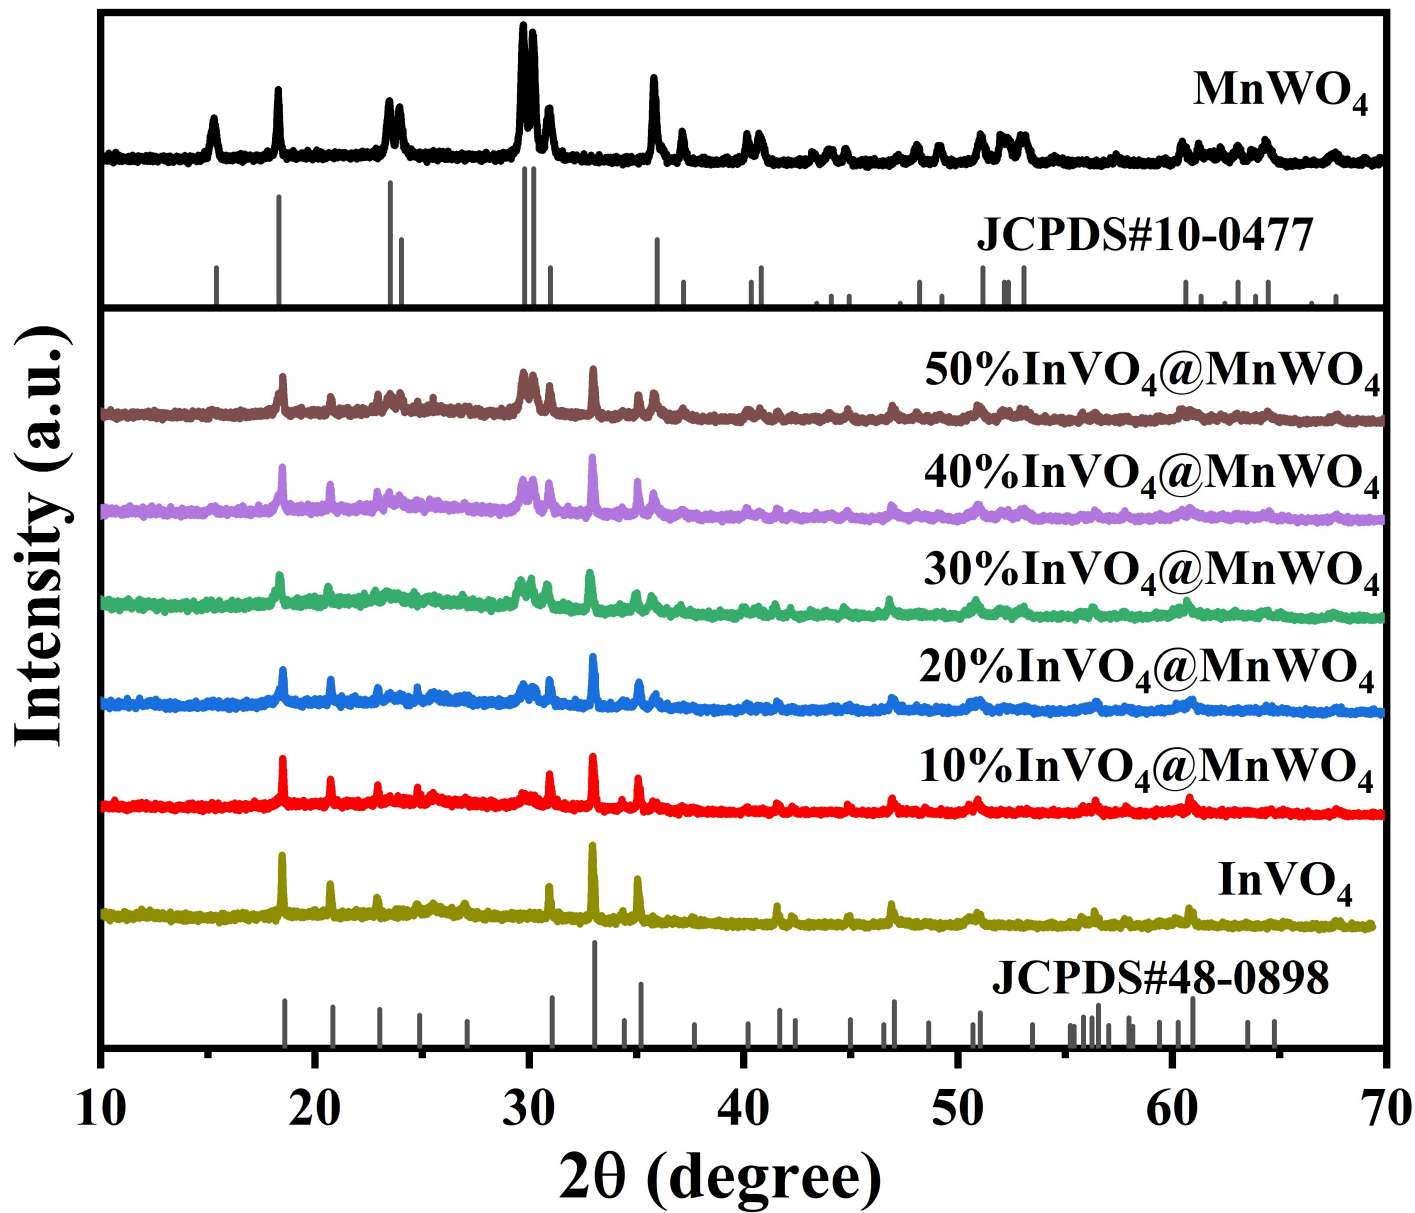

Supplement: d4nj05419a5.pdf [file d4nj05419a5.pdf]

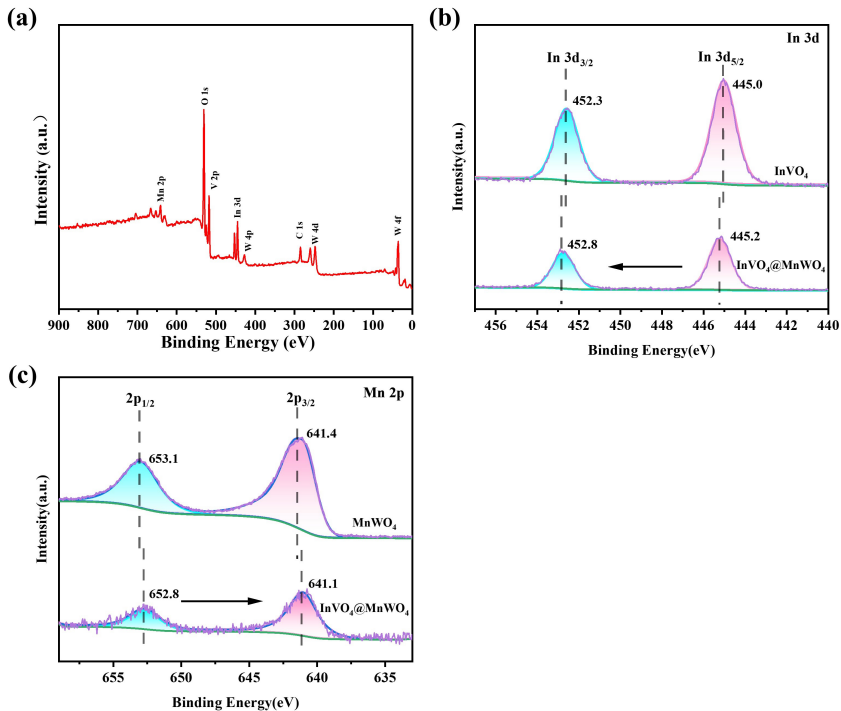

Supplement: d4nj05419a6.pdf [file d4nj05419a6.pdf]

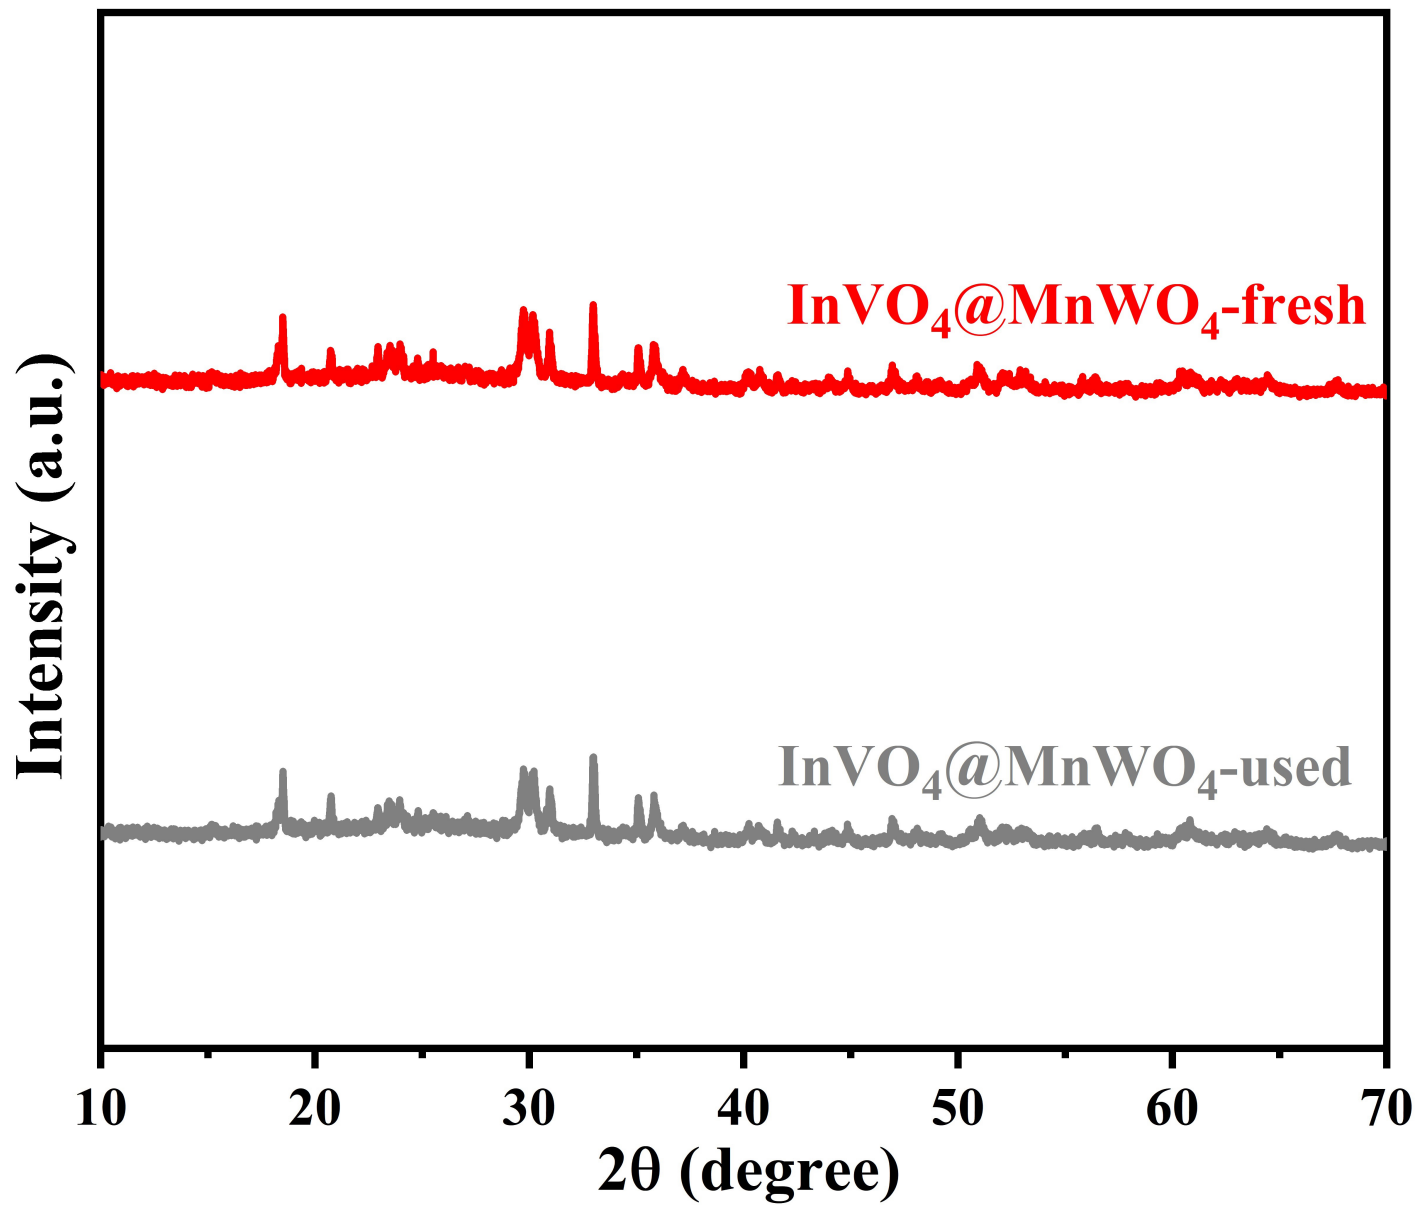

Supplement: d4nj05419a7.pdf [file d4nj05419a7.pdf]

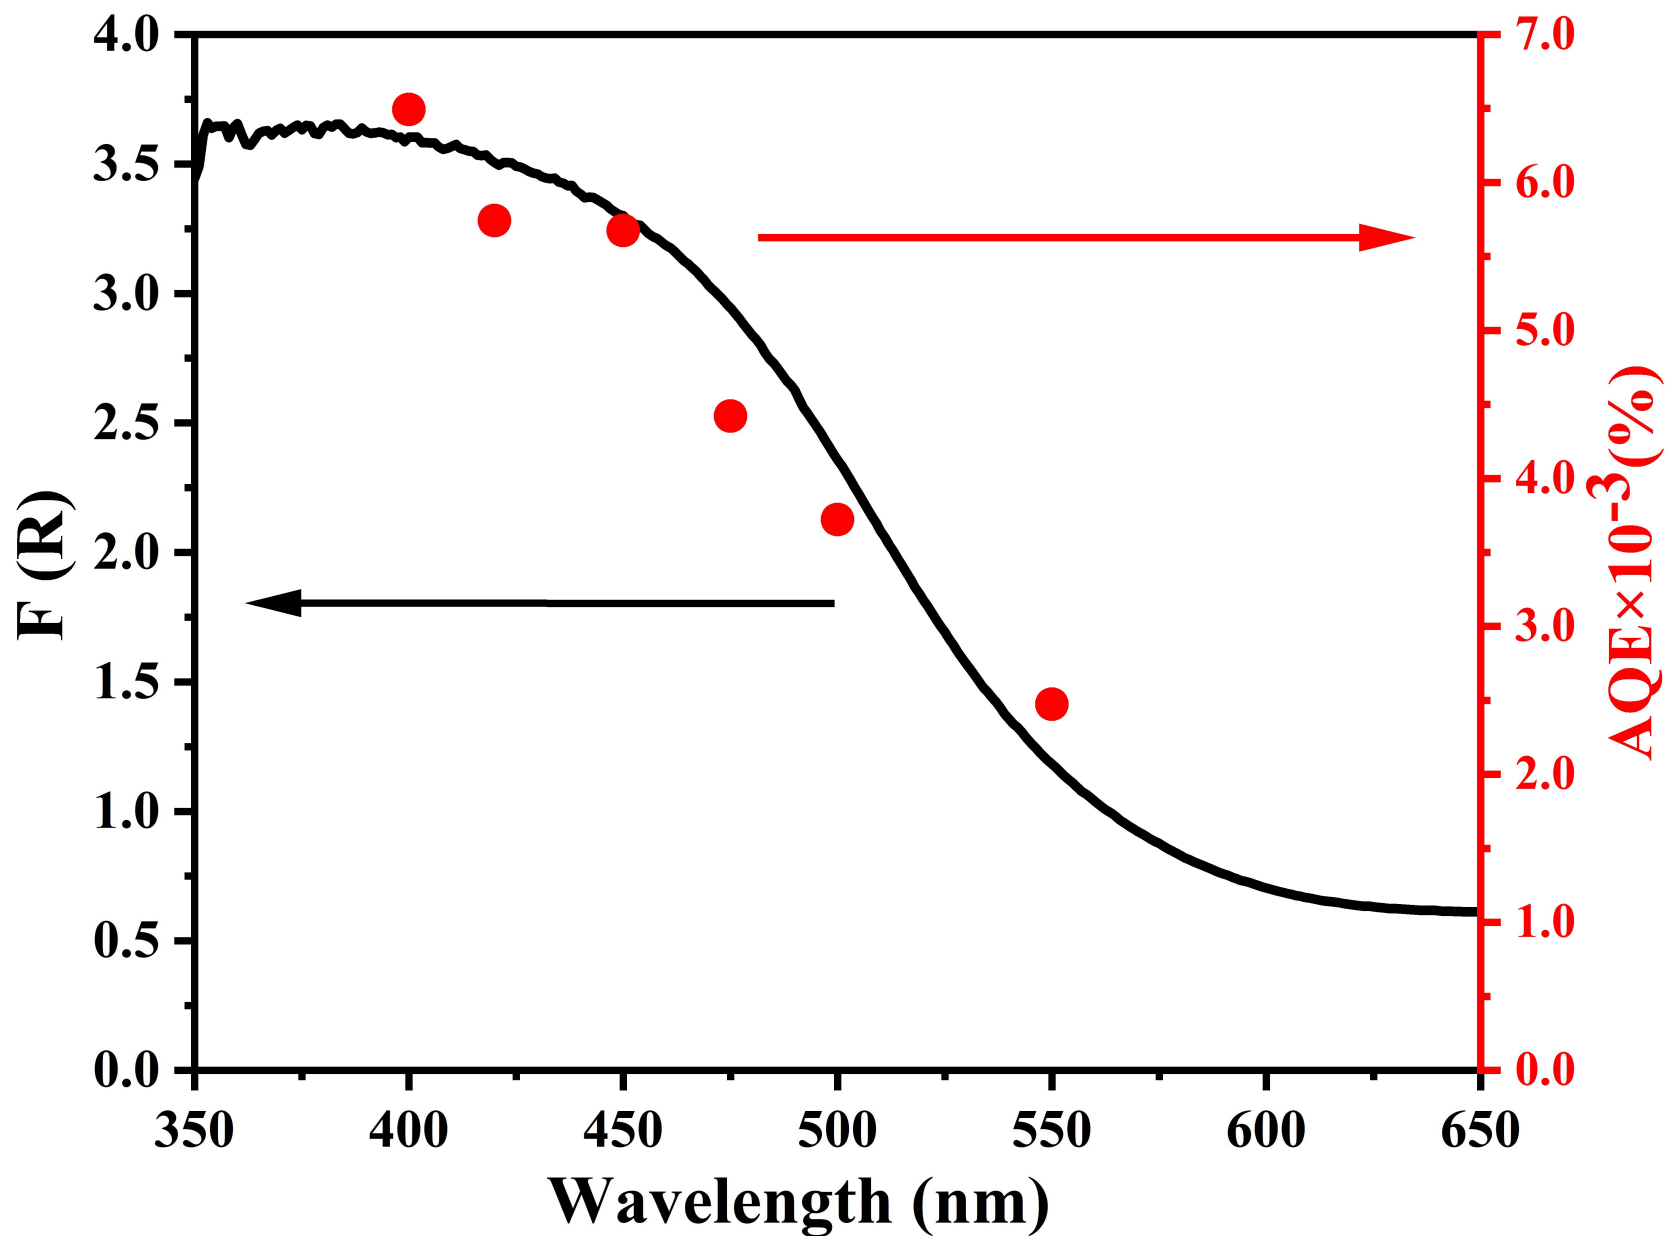

Supplement: d4nj05419a8.pdf [file d4nj05419a8.pdf]

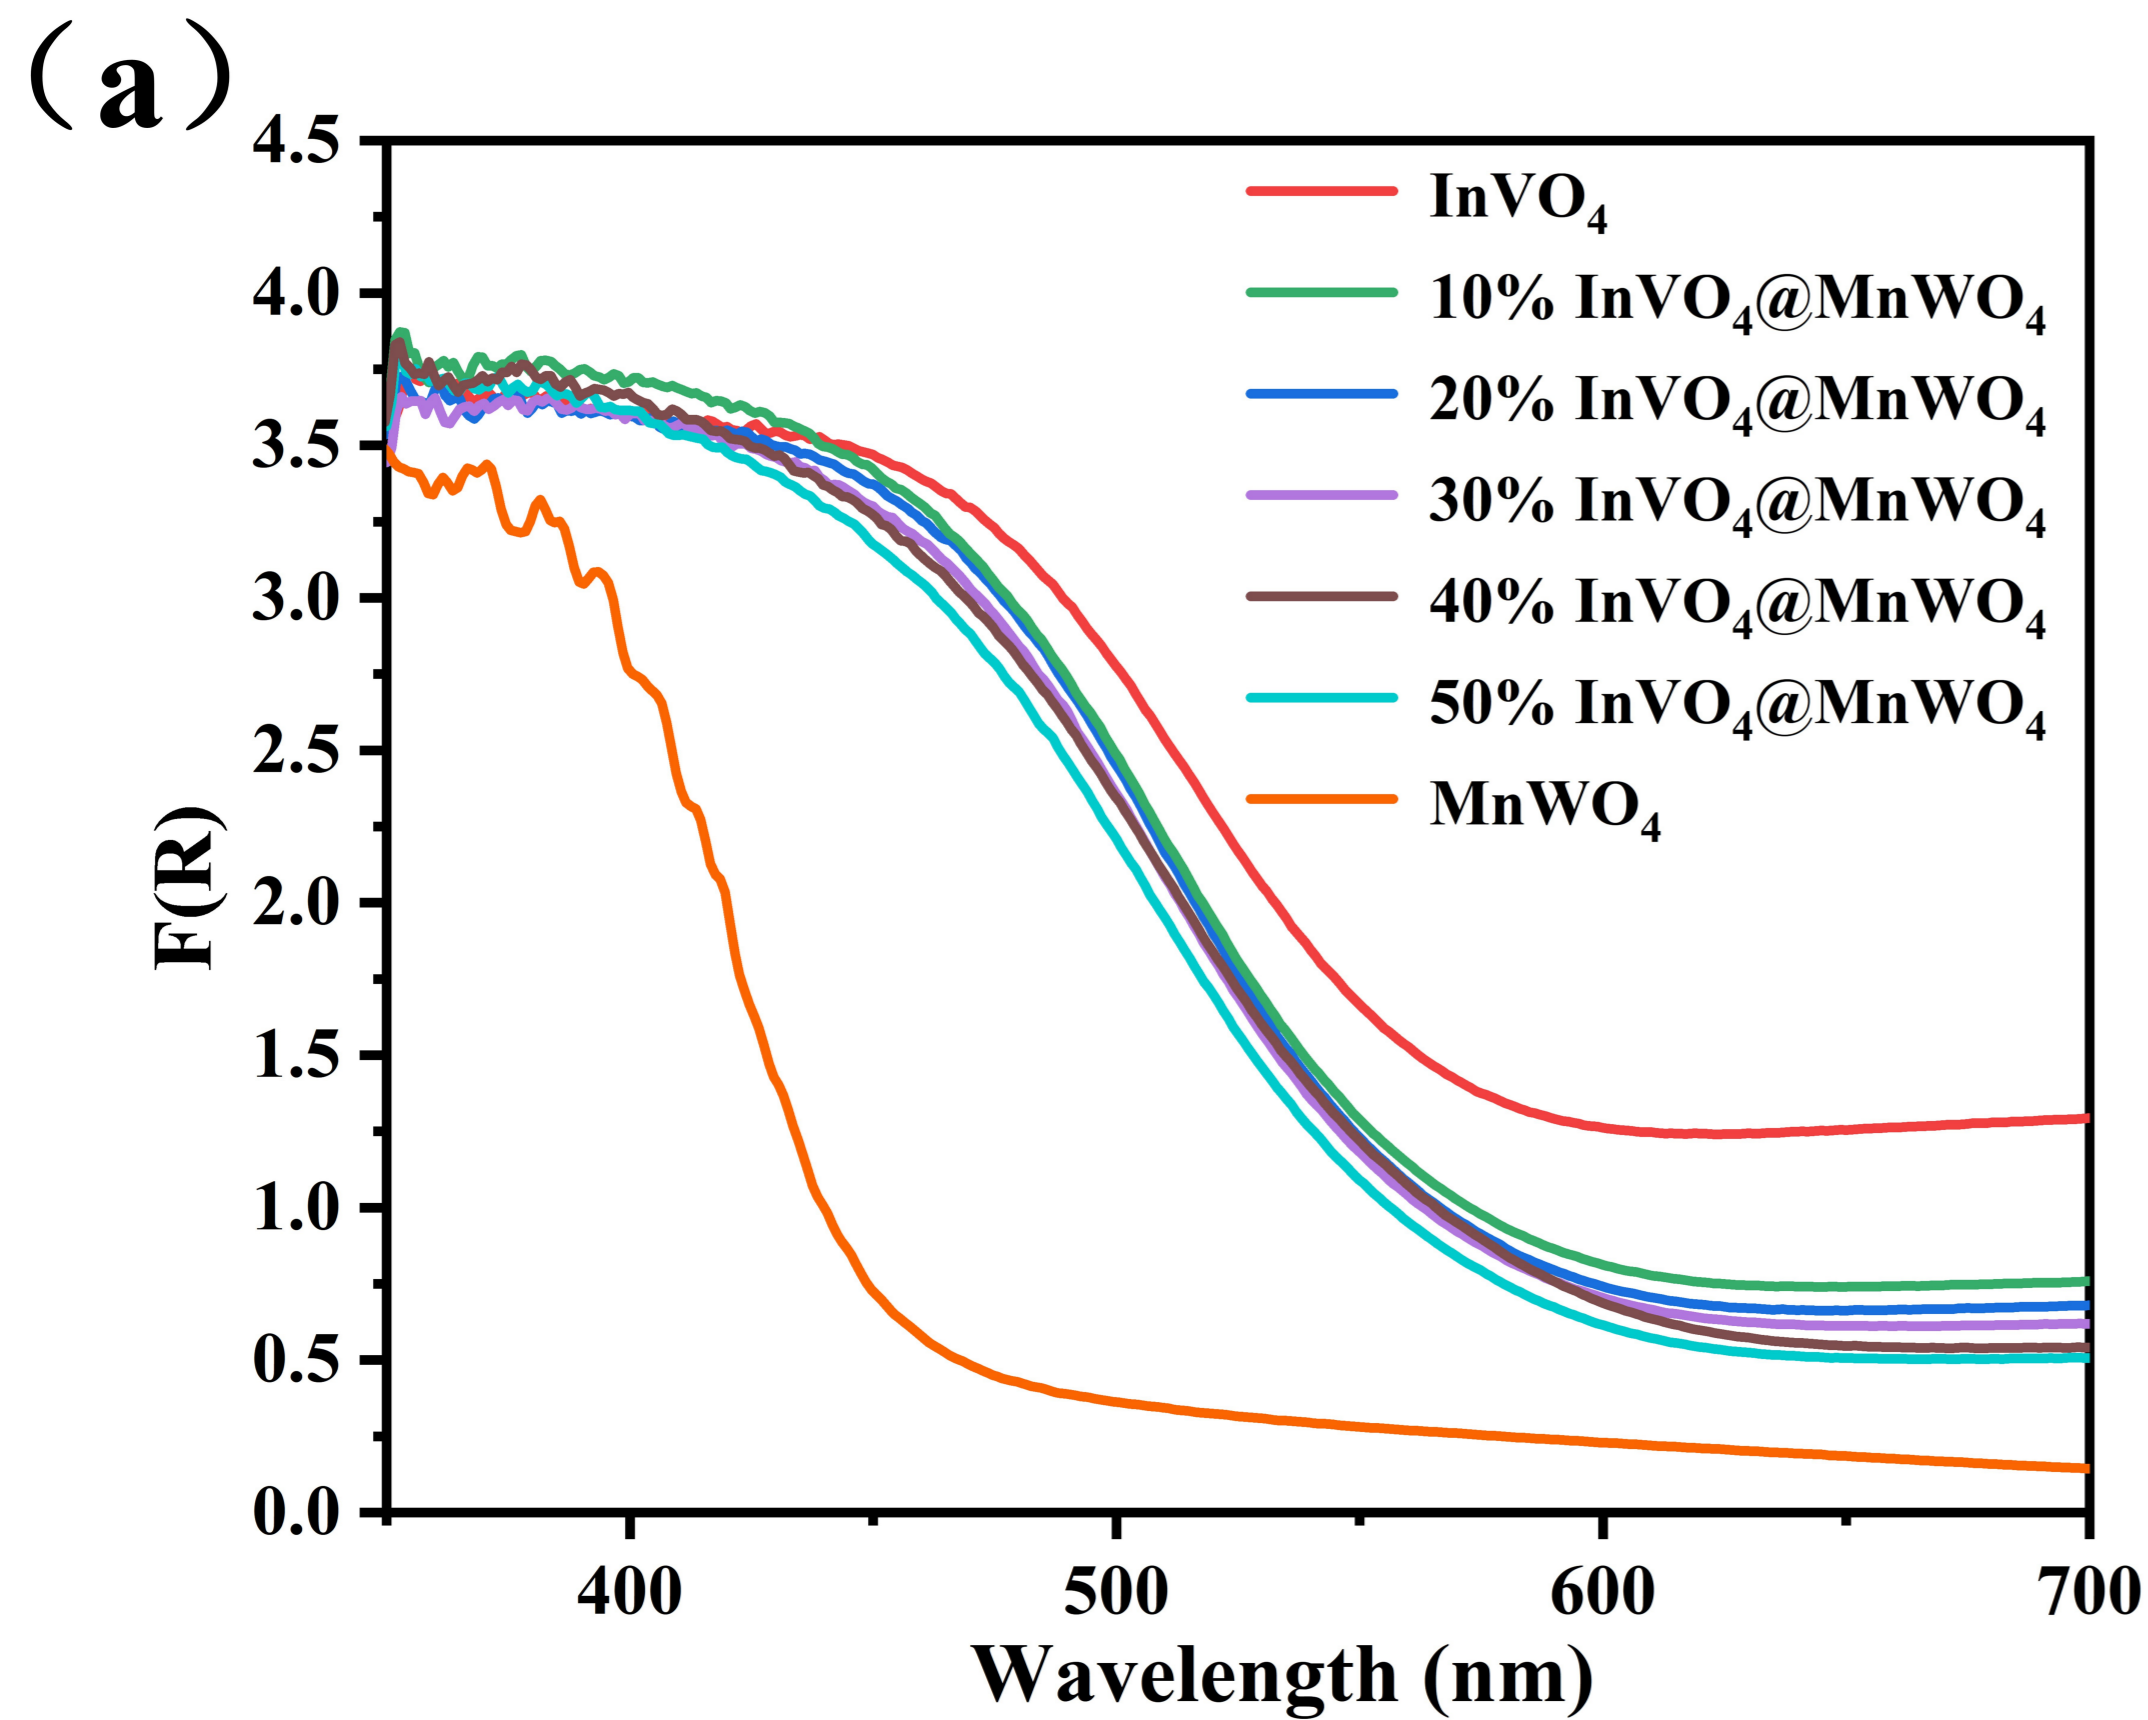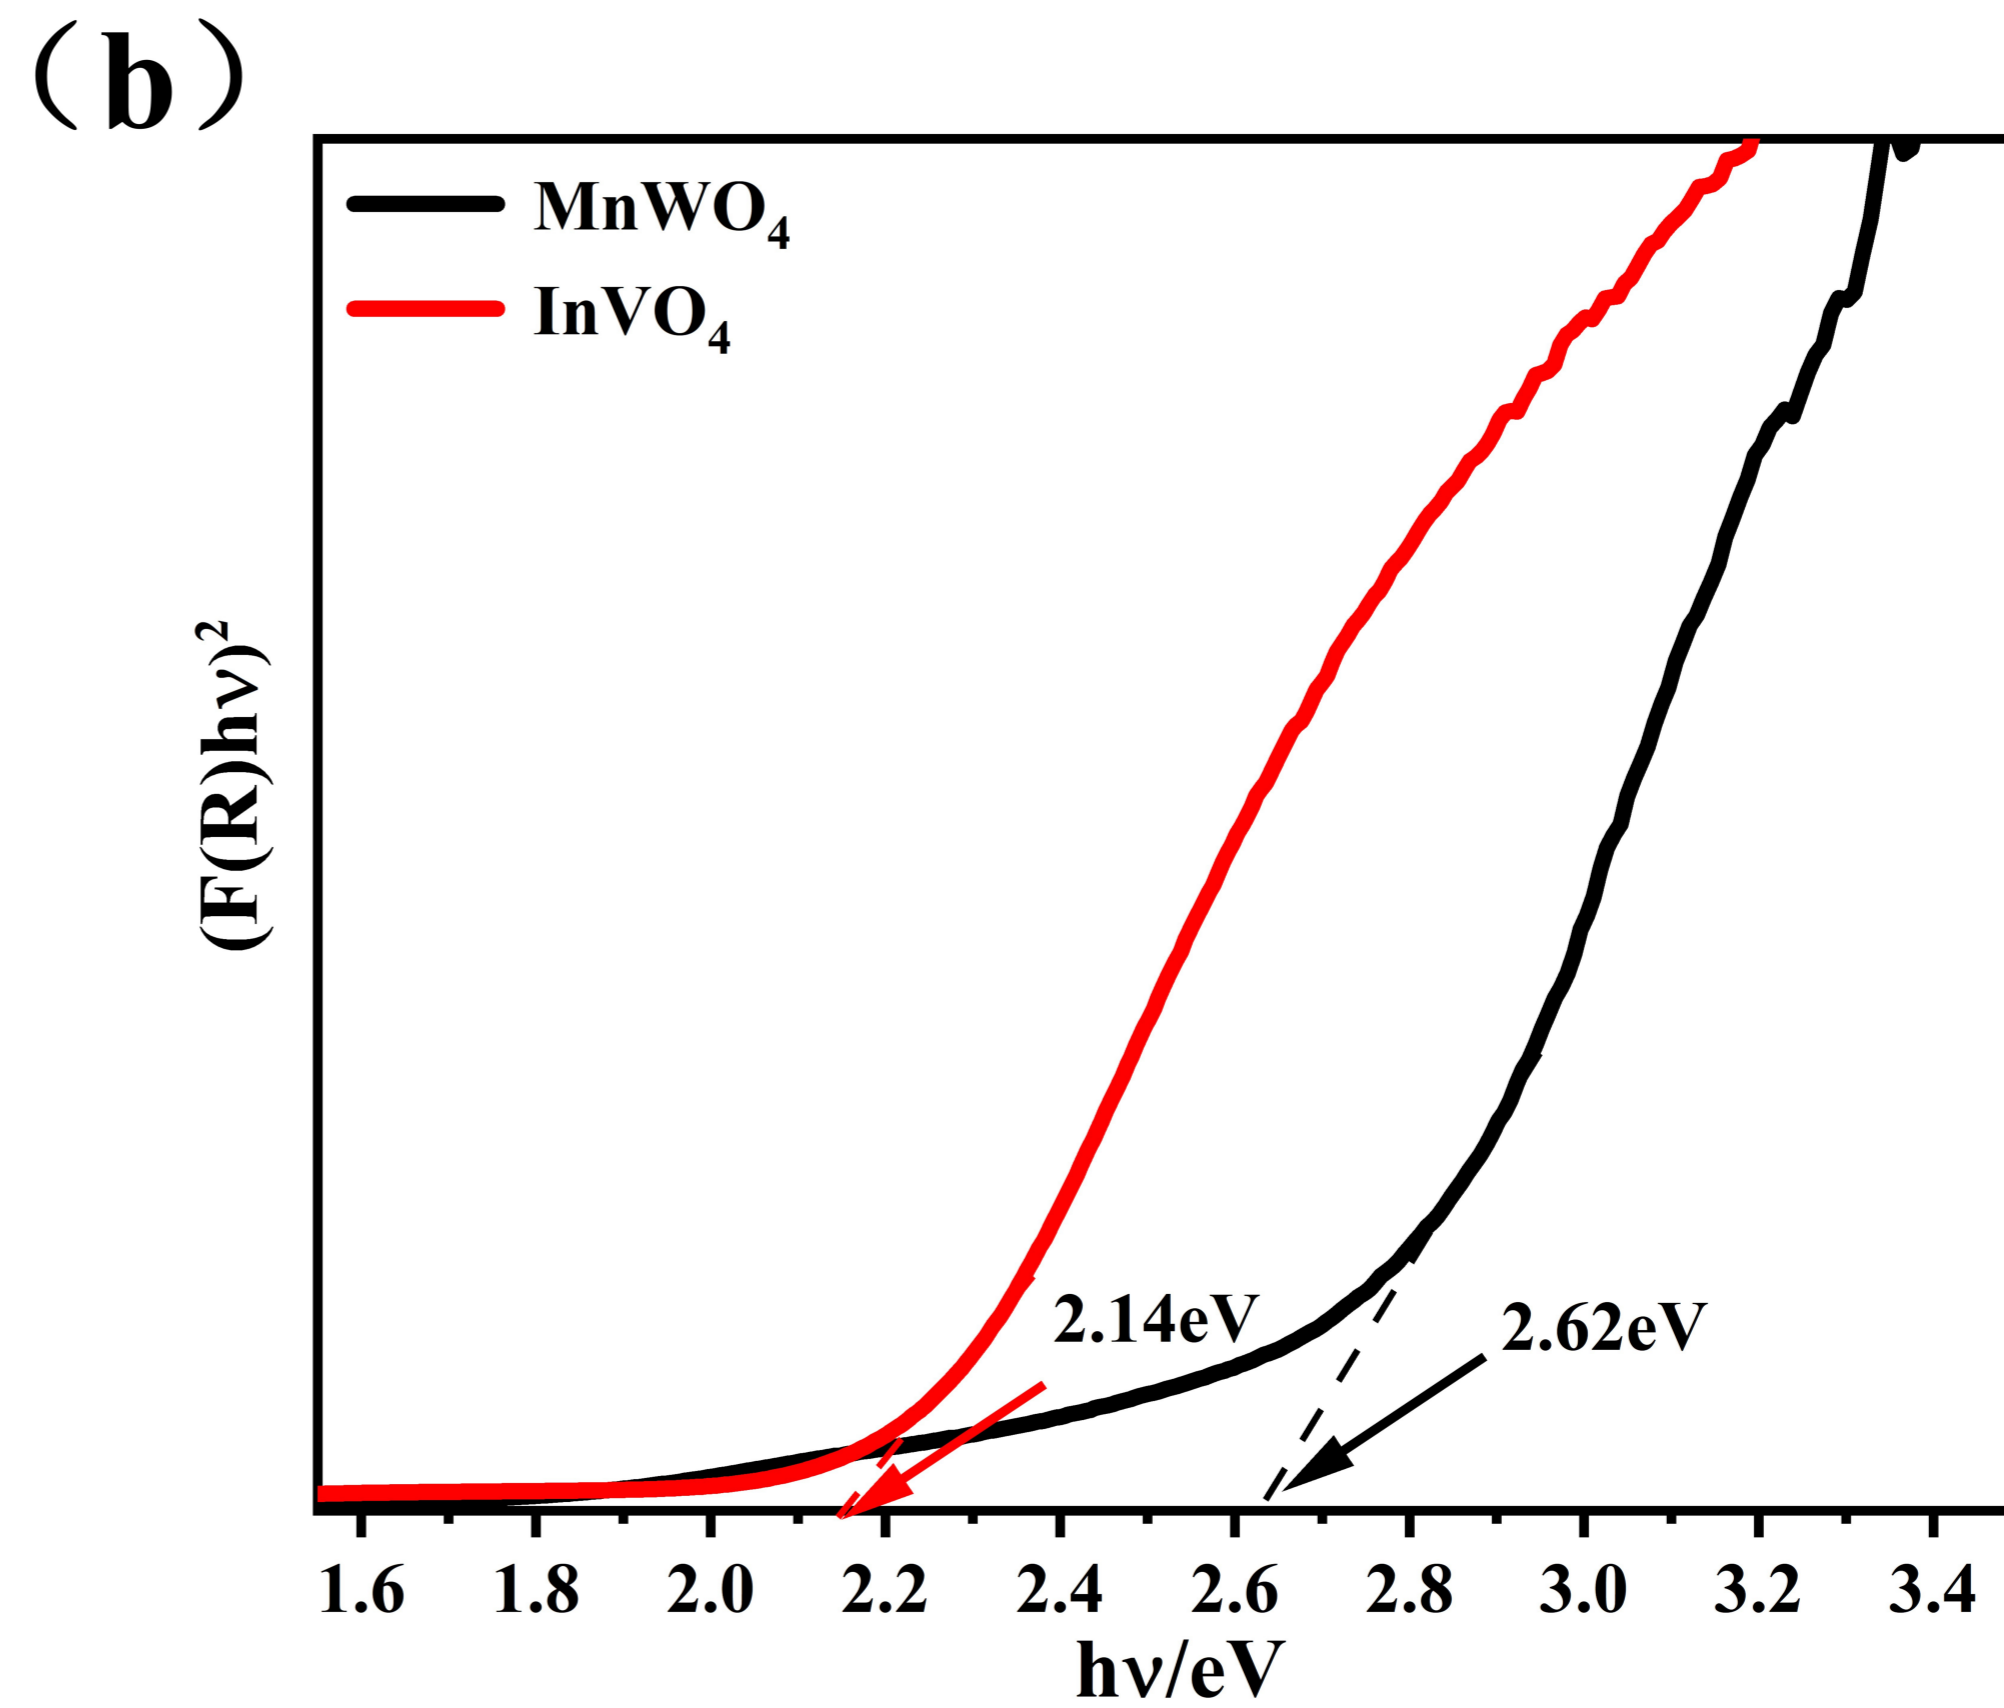

Supplement: d4nj05419a9.pdf [file d4nj05419a9.pdf]
